# Supplementary material for: Single cell tracing of Pomc neurons reveals recruitment of ‘Ghost’ subtypes with atypical identity in a mouse model of obesity
Source: PubMed Central journal article supplement (PMC11043070; doi:10.1038/s41467-024-47877-2), 2024-04-24
Supplement: 41467_2024_47877_MOESM2_ESM.pdf [file 41467_2024_47877_MOESM2_ESM.pdf]

## Peer Review File

---

Single cell tracing of Pomc neurons reveals recruitment of 'Ghost' subtypes with atypical identity in a mouse model of obesity

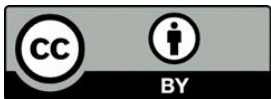

**Open Access** This file is licensed under a Creative Commons Attribution 4.0

International License, which permits use, sharing, adaptation, distribution and reproduction in any medium or format, as long as you give appropriate credit to

the original author(s) and the source, provide a link to the Creative Commons license, and indicate if changes were made. In the cases where the authors are anonymous, such as is the case for the reports of anonymous peer reviewers, author attribution should be to 'Anonymous Referee' followed by a clear attribution to the source work. The images or other third party material in this file are included in the article's Creative Commons license, unless indicated otherwise in a credit line to the material. If material is not included in the article's Creative Commons license and your intended use is not permitted by statutory regulation or exceeds the permitted use, you will need to obtain permission directly from the copyright holder. To view a copy of this license, visit <http://creativecommons.org/licenses/by/4.0/>.

**Editorial Note:** This manuscript has been previously reviewed at another journal that is not operating a transparent peer review scheme. This document only contains reviewer comments and rebuttal letters for versions considered at *Nature Communications* .

## **REVIEWERS' COMMENTS**

Reviewer #1 (Remarks to the Author):

I appreciated the effort of the authors have made to argue for a new type of ghost cells from POMC neurons in response to HFD. However, I am sorry to say that I am still not convinced that the evidence as presented convincingly demonstrate a formation of a functionally distinct group of non-POMC neurons from POMC cell lineage that contribute to DIO. The evidence indeed suggests an existence of a subset of POMC neurons that respond to HDF by altering levels of a series of genes including reducing POMC expression. However, it is unknown whether these changes contribute to DIO or represent a secondary effect to HFD.

There is no mechanism identified for the proposed formation of new type of neurons nor a functional contribution of these proposed ghost cells to DIO was shown. Thus, in my review the results illustrated do not support the main claim here.

Reviewer #3 (Remarks to the Author):

The authors have addressed my comments raised during the second revision of this manuscript. I appreciate their efforts in incorporating these new insights and adjusting the manuscript in accordance with my suggestions.
